# Supplementary material for: Bipolar nitrogen-doped graphene frameworks as high-performance cathodes for lithium ion batteries
Source: Royal Society of Chemistry journal article supplement (doi:10.1039/c6ta09161j), 2016-12-01
Supplement: c6ta09161j1.pdf [file c6ta09161j1.pdf]

## Supporting Information

### Bipolar Nitrogen-Doped Graphene Frameworks as High-Performance Cathodes for Lithium Ion Batteries

**Table S1.** Comparison of the electrochemical performance of N-GF-450 and previously reported organic and non-inorganic cathodes.

| Sample                                                                               | Current density<br>(mA g <sup>-1</sup> ) | Specific capacity<br>(mAh g <sup>-1</sup> ) (cycle) | Ref.                                                    |
|--------------------------------------------------------------------------------------|------------------------------------------|-----------------------------------------------------|---------------------------------------------------------|
| PI/SWNT                                                                              | 221.5                                    | 175 (200)                                           | <i>Adv. Mater.</i> 2014, 26, 3338                       |
| PMTA/SWNT                                                                            | 191                                      | 127 (200)                                           | <i>Adv. Mater.</i> 2015, 27, 6504                       |
| Fe <sub>5</sub> (PO <sub>4</sub> ) <sub>4</sub> (OH) <sub>3</sub> ·2H <sub>2</sub> O | 50                                       | 155 (300)                                           | <i>J. Mater. Chem. A</i> 2014, 2, 6174                  |
| PMAQ-SWNT                                                                            | 221                                      | 150 (300)                                           | <i>J. Mater. Chem. A</i> , 2016, 4, 2115                |
| LFP-SG                                                                               | 17                                       | 130 (100)                                           | <i>Adv. Energy Mater.</i> 2013, 3, 113                  |
| amorphized FeF <sub>3</sub>                                                          | 23.7                                     | 200 (85)                                            | <i>Adv. Mater.</i> , 2014, 26, 2558.                    |
| PI-FLEG                                                                              | 221                                      | 108 (200)                                           | <i>RSC Adv.</i> , 2016, 6, 33287                        |
| (AQ)/CMK-3                                                                           | 514                                      | 174(200)                                            | <i>Adv. Sci.</i> , 2015, 2, DOI: 10.1002/adv.201500018. |
| Cu(2,7-AQDC)                                                                         | 1                                        | 105(50)                                             | <i>J. Am. Chem. Soc.</i> , 2014, 136, 16112.47          |
| PBQS                                                                                 | 500                                      | 158(1000)                                           | <i>Adv. Sci.</i> , 2015, 2, DOI: 10.1002/adv.201500018. |
| N-GF-450                                                                             | 500                                      | 370 (2500)                                          | This work                                               |

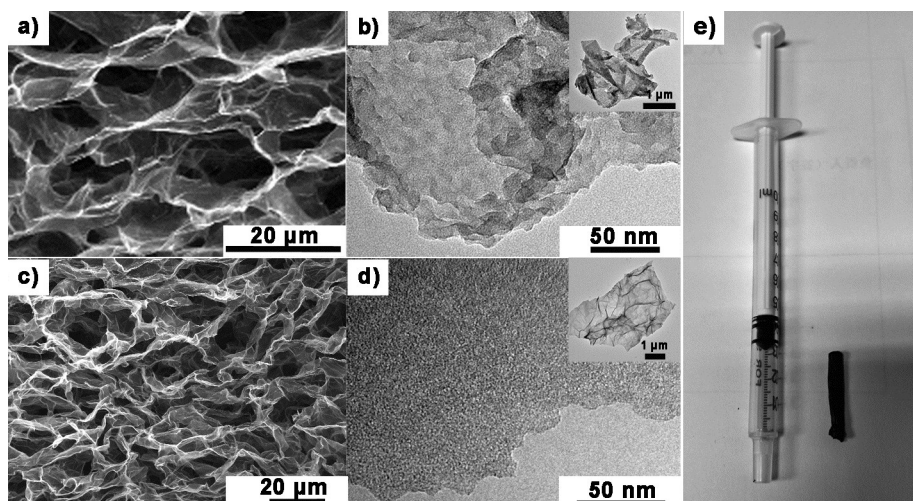

**Fig. S1** SEM and HR-TEM of N-GF-300 (a and b) and N-GF-600 (c and d). Insets b and d TEM images of N-GF-300 and N-GF-600. e) Photograph of N-GFs monoliths after removal from the syringe and thermal treatment.

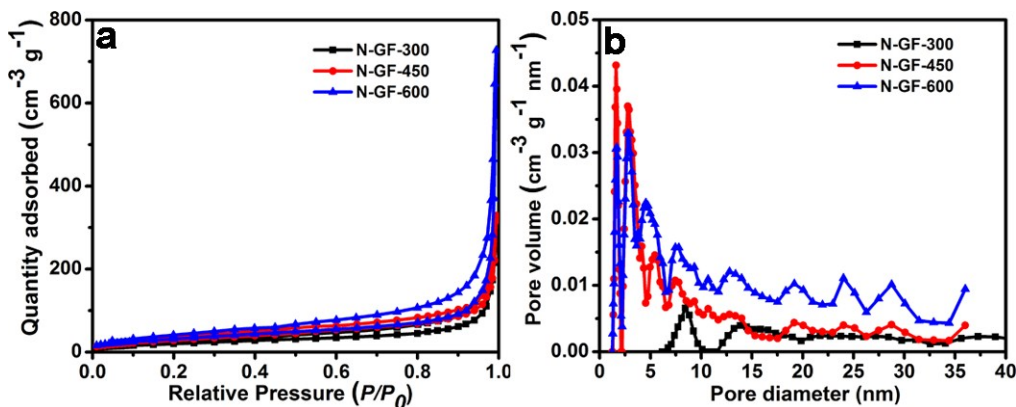

**Fig. S2** a) Nitrogen adsorption and desorption isotherms and b) pore size distributions of N-GFs

**Table S2.** Nitrogen and oxygen contents of the N-GFs in the work

| Sample          | N-GF-300 | N-GF-450 | N-GF-600 |
|-----------------|----------|----------|----------|
| N (wt.% by EA)  | 4.51     | 6.36     | 5.48     |
| N (wt.% by XPS) | 4.68     | 6.63     | 4.88     |
| N(at.% by XPS)  | 4.16     | 5.14     | 4.26     |
| O(wt.% by XPS)  | 11.43    | 9.39     | 8.97     |
| O(at.% by XPS)  | 8.89     | 7.28     | 6.94     |

From the XPS result showed that the content of O atom in the N-GF-300, N-GF-450 and N-GF-600 are 8.89, 7.28 and 6.94 at.%, respectively. The content is reduced with the increased of carbonization temperature because of the oxygen functional groups on the graphene surface are decomposed during 300-600 °C.

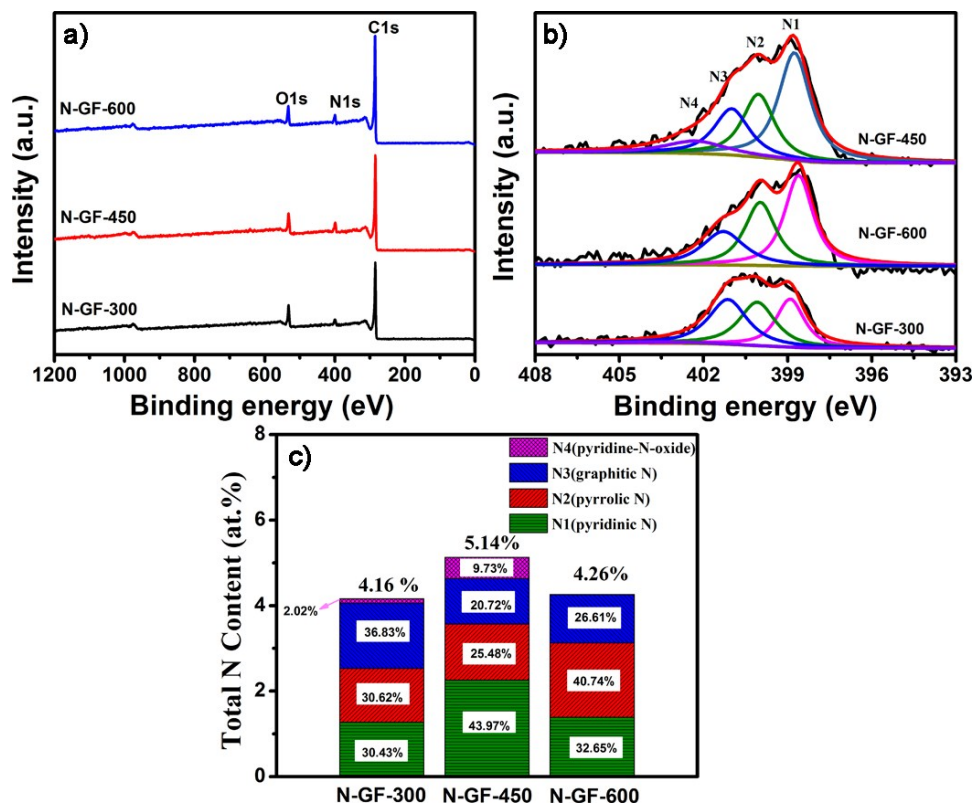

**Fig. S3** a) XPS spectra of N-GF-300, N-GF-450, N-GF-600, b) the corresponding high-resolution N1s peak and c) Atomic percentages of four nitrogen species for N-GF-300, N-GF-450, N-GF-600 derived from XPS analysis.

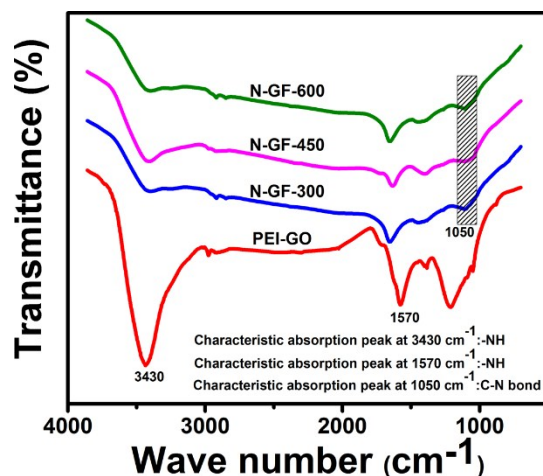

**Fig. S4** FTIR spectra of PEI-GO, N-GF-300, N-GF-450 and N-GF-600

The successful build-up of N-doped in graphene framework was also confirmed by Fourier transform infrared (FTIR) spectroscopy (Fig. S4). The strong absorption peaks at 3430 and 1570 cm<sup>-1</sup> in PEI-GO are assigned to the stretching vibration of -NH. After being thermally treated, the absorption peak 1050 cm<sup>-1</sup> is appeared in N-GFs, which can be attributed to the stretch vibration of the C-N bond, thus indicating the successful N doped on graphene framework.

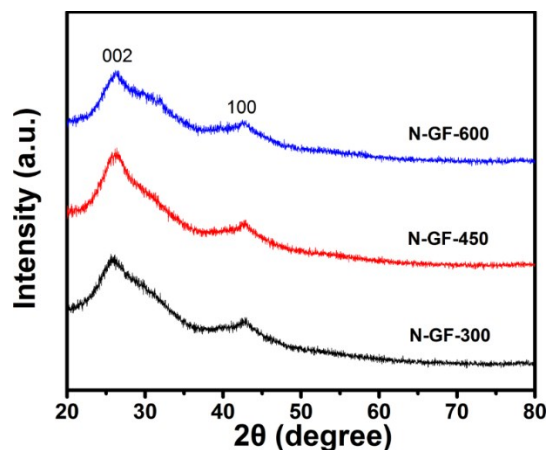

Fig. S5 XRD patterns of N-GF-300, N-GF-450 and N-GF-600

Additionally, the three N-GFs show very closed X-ray diffraction (XRD) patterns with broad peaks at 25 and 43°, corresponding to (002) and (100) diffractions of graphitic carbon (Fig. S5), which indicates the carbon frameworks of these samples have similar crystalline degrees.

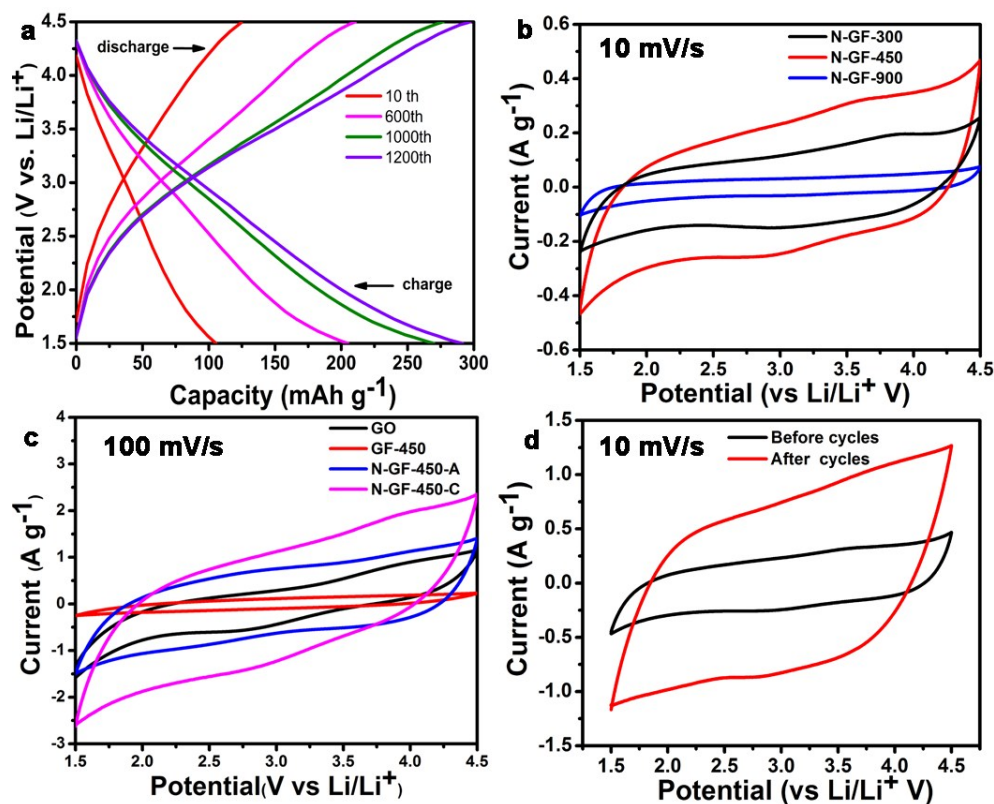

Fig. S6 a) charge-discharge profile of N-GF-450 at the current density of 0.5 A g<sup>-1</sup>. b) Cyclic voltammetry (CV) curves of N-GF-300, N-GF-450 and N-GF-600 at the scan rate of 10 mV s<sup>-1</sup>. c) CV curves of GF-450, GO, N-GF-450-A and N-GF-450-C at the scan rate of 100 mV s<sup>-1</sup>. d) CV curves of N-GF-450 before and after 2500 cycles at the scan rate of 10 mV s<sup>-1</sup>.

GF-450 without the doping of N atoms shows no peaks in the CV curve, suggesting that the electrochemical reaction is negligible in the potential range of 1.5 -4.5 V (Fig. 2a and Fig. S6). For

GO, a couple of redox peaks is observed at about 2.8/4.2 V, due to the association/disassociation of Li ion process between  $\text{Li}^+$  and the carbonyl, hydroxyl and epoxy groups on the electrode materials. All N-GFs show higher peak current than GO and GF-450, indicating that the N-GFs have more electrochemical active species and higher capacity.

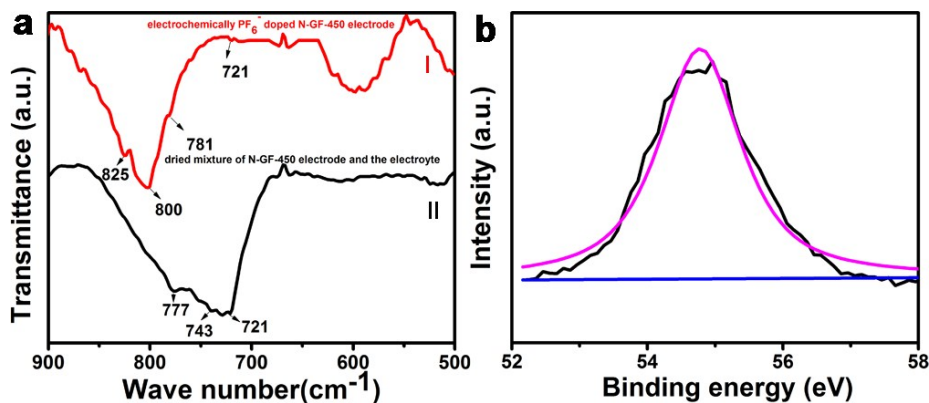

**Fig. S7** a) FTIR spectra of N-GF-450 in the full charged state and b) Core-level XPS spectra of Li 1s spectrum of N-GF-450 in the full discharged state.

The FTIR spectra of N-GF-450 also confirm that the  $\text{PF}_6^-$  is electrochemically doped in N-GF-450 at full charge state (4.5 V, p-doped region, Fig. S6a, red), compared with the dried mixture of N-GF-450 and the electrolyte (1M  $\text{LiPF}_6$  in EC:DMC, Fig. S6a, black). The  $\text{PF}_6^-$  doped in N-GF-450 is indicated as I, the mixture of N-GF-450 and electrolyte is indicated as II. The peak at 775 and 717  $\text{cm}^{-1}$  in II is attributed to EC. The peak at 830  $\text{cm}^{-1}$  in both I and II can be assigned to the infrared-active  $\nu_3$  mode for compounds consisting of  $\text{PF}_6^-$ . The peak at 743  $\text{cm}^{-1}$  in I which is infrared-inactive  $\nu_1$  mode for free  $\text{PF}_6^-$ , which becomes active due to the coordination to N-GF-450. The coordination interaction between Li and N lone-pair electrons can be further confirmed by XPS after full discharge to 1.5 V (Fig. S6b). The Li 1s spectrum can be fitted with the peak at 54.7 eV, which can be attributed to Li-N bond.

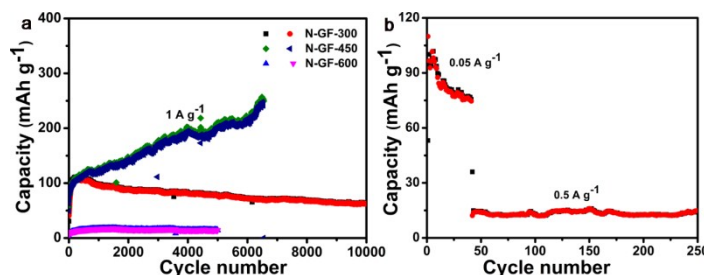

**Fig. S8** Cycling performance of a) N-GFs at a current density of 1  $\text{A g}^{-1}$  and b) GF-450 at 0.05 and 0.5  $\text{A g}^{-1}$ . Without the doping of N atoms, GF-450 only delivers a low capacity of 15  $\text{mAh g}^{-1}$  at 0.5  $\text{A g}^{-1}$ .

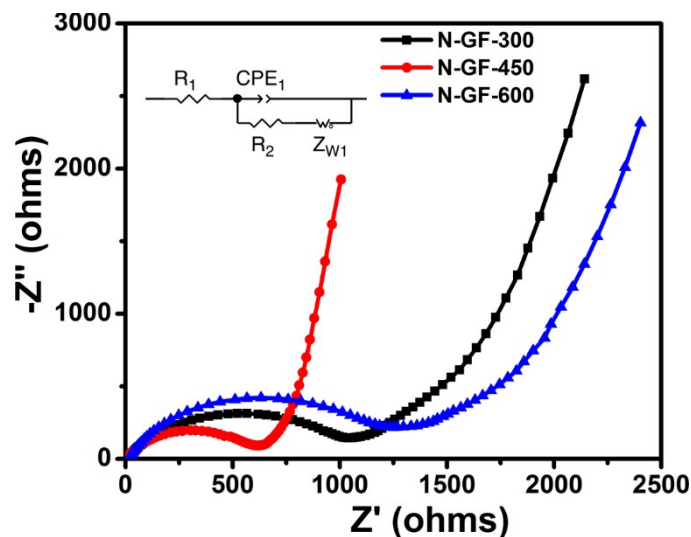

**Fig. S9** Nyquist plots of N-GF electrodes obtained by applying a sine wave amplitude of 5.0 mV over the frequency range 100 kHz–0.01 Hz.(inset: the Randles equivalent circuit).

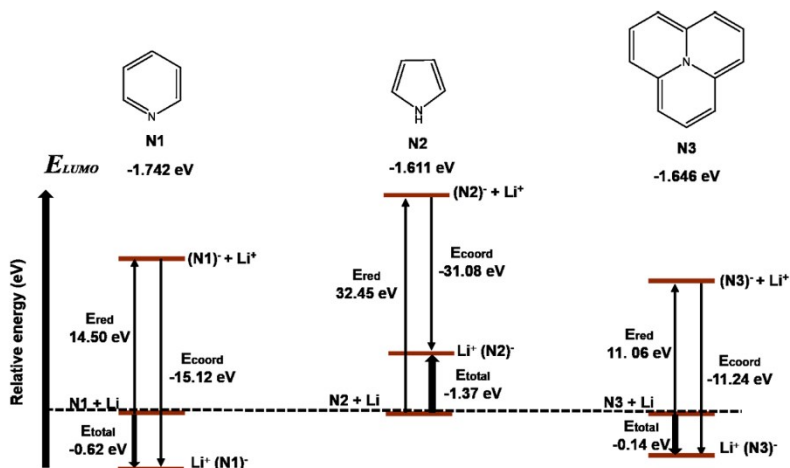

**Fig. S10** Redox properties of cyclic 1,2-diketones obtained by DFT calculations (B3LYP/6-31G(d)). Relative energies (eV) of the reduced forms without and with Li coordination based on the neutral form.

The capacity is calculated via  $C=Q/M$ .  $Q$  charge = Number of Li atoms in cathode \*e  $M$ =mass of Li-N-doped graphene. The capacity is calculated at certain voltage (3V) which is found by Exp. The specific capacity of the N-doped graphene (N content of approximately 5 at.%) with a Li concentration of 5 at.% was estimated to be 121 mAh  $g^{-1}$ .
